# Supplementary material
Source: publisher figshare collection journal article supplement (https://sage.figshare.com/ndownloader/files/33082480)
Supplement: Supplementary file 1 [file 33082480]

## Appendix I: Search strategy

| **Electronic Bibliographic Databases** | **Search Strategy** |
| --- | --- |
| MEDLINE (Pubmed) | ((((((Adult OR Adults) OR ("Middle Aged" OR "Middle Age")) OR (Aged OR Elderly)) OR ("Aged, 80 and over" OR "Oldest Old" OR Nonagenarians OR Nonagenarian OR Octogenarians OR Octogenarian OR Centenarians OR Centenarian)) AND (((Pharmacists[MeSH Terms]) OR (Pharmacists[Title/Abstract] OR Pharmacist[Title/Abstract] OR "Clinical Pharmacists"[Title/Abstract] OR "Clinical Pharmacist"[Title/Abstract] OR "Pharmacist, Clinical"[Title/Abstract] OR "Pharmacists, Clinical"[Title/Abstract] OR "Community Pharmacists"[Title/Abstract] OR "Community Pharmacist"[Title/Abstract] OR "Pharmacist, Community"[Title/Abstract] OR "Pharmacists, Community"[Title/Abstract] OR "Retail Pharmacists"[Title/Abstract] OR "Pharmacist, Retail"[Title/Abstract] OR "Pharmacists, Retail"[Title/Abstract] OR "Retail Pharmacist"[Title/Abstract])) OR ((Pharmaceutical Services[MeSH Terms]) OR ("Pharmaceutical Services"[Title/Abstract] OR "Services, Pharmaceutic"[Title/Abstract] OR "Services, Pharmacy"[Title/Abstract] OR "Pharmaceutic Services"[Title/Abstract] OR "Pharmaceutic Service"[Title/Abstract] OR "Service, Pharmaceutic"[Title/Abstract] OR "Services, Pharmaceutical"[Title/Abstract] OR "Pharmaceutical Service"[Title/Abstract] OR "Service, Pharmaceutical"[Title/Abstract] OR "Pharmacy Services"[Title/Abstract] OR "Pharmacy Service"[Title/Abstract] OR "Service, Pharmacy"[Title/Abstract] OR "Pharmaceutical Care"[Title/Abstract] OR "Care, Pharmaceutical"[Title/Abstract])))) AND ((Palliative Care[MeSH Terms]) OR ("Palliative Care"[Title/Abstract] OR "Care, Palliative"[Title/Abstract] OR "Palliative Treatment"[Title/Abstract] OR "Palliative Treatments"[Title/Abstract] OR "Treatment, Palliative"[Title/Abstract] OR "Treatments, Palliative"[Title/Abstract] OR "Therapy, Palliative"[Title/Abstract] OR "Palliative Therapy"[Title/Abstract] OR "Palliative Supportive Care"[Title/Abstract] OR "Supportive Care, Palliative"[Title/Abstract] OR "Palliative Surgery"[Title/Abstract] OR "Surgery, Palliative"[Title/Abstract]))) AND ((Neoplasms[MeSH Terms]) OR (Neoplasms[Title/Abstract] OR Neoplasia[Title/Abstract] OR Neoplasias[Title/Abstract] OR Neoplasm[Title/Abstract] OR Tumors[Title/Abstract] OR Tumor[Title/Abstract] OR Cancer[Title/Abstract] OR Cancers[Title/Abstract] OR Malignancy[Title/Abstract] OR Malignancies[Title/Abstract] OR "Malignant Neoplasms"[Title/Abstract] OR "Malignant Neoplasm"[Title/Abstract] OR "Neoplasm, Malignant"[Title/Abstract] OR "Neoplasms, Malignant"[Title/Abstract])) |
| PUBMED PMC | ((((((Adult OR Adults) OR ("Middle Aged" OR "Middle Age")) OR (Aged OR Elderly)) OR ("Aged, 80 and over" OR "Oldest Old" OR Nonagenarians OR Nonagenarian OR Octogenarians OR Octogenarian OR Centenarians OR Centenarian)) AND (((Pharmacists[MeSH Terms]) OR (Pharmacists[Title/Abstract] OR Pharmacist[Title/Abstract] OR "Clinical Pharmacists"[Title/Abstract] OR "Clinical Pharmacist"[Title/Abstract] OR "Pharmacist, Clinical"[Title/Abstract] OR "Pharmacists, Clinical"[Title/Abstract] OR "Community Pharmacists"[Title/Abstract] OR "Community Pharmacist"[Title/Abstract] OR "Pharmacist, Community"[Title/Abstract] OR "Pharmacists, Community"[Title/Abstract] OR "Retail Pharmacists"[Title/Abstract] OR "Pharmacist, Retail"[Title/Abstract] OR "Pharmacists, Retail"[Title/Abstract] OR "Retail Pharmacist"[Title/Abstract])) OR ((Pharmaceutical Services[MeSH Terms]) OR ("Pharmaceutical Services"[Title/Abstract] OR "Services, Pharmaceutic"[Title/Abstract] OR "Services, Pharmacy"[Title/Abstract] OR "Pharmaceutic Services"[Title/Abstract] OR "Pharmaceutic Service"[Title/Abstract] OR "Service, Pharmaceutic"[Title/Abstract] OR "Services, Pharmaceutical"[Title/Abstract] OR "Pharmaceutical Service"[Title/Abstract] OR "Service, Pharmaceutical"[Title/Abstract] OR "Pharmacy Services"[Title/Abstract] OR "Pharmacy Service"[Title/Abstract] OR "Service, Pharmacy"[Title/Abstract] OR "Pharmaceutical Care"[Title/Abstract] OR "Care, Pharmaceutical"[Title/Abstract])))) AND ((Palliative Care[MeSH Terms]) OR ("Palliative Care"[Title/Abstract] OR "Care, Palliative"[Title/Abstract] OR "Palliative Treatment"[Title/Abstract] OR "Palliative Treatments"[Title/Abstract] OR "Treatment, Palliative"[Title/Abstract] OR "Treatments, Palliative"[Title/Abstract] OR "Therapy, Palliative"[Title/Abstract] OR "Palliative Therapy"[Title/Abstract] OR "Palliative Supportive Care"[Title/Abstract] OR "Supportive Care, Palliative"[Title/Abstract] OR "Palliative Surgery"[Title/Abstract] OR "Surgery, Palliative"[Title/Abstract]))) AND ((Neoplasms[MeSH Terms]) OR (Neoplasms[Title/Abstract] OR Neoplasia[Title/Abstract] OR Neoplasias[Title/Abstract] OR Neoplasm[Title/Abstract] OR Tumors[Title/Abstract] OR Tumor[Title/Abstract] OR Cancer[Title/Abstract] OR Cancers[Title/Abstract] OR Malignancy[Title/Abstract] OR Malignancies[Title/Abstract] OR "Malignant Neoplasms"[Title/Abstract] OR "Malignant Neoplasm"[Title/Abstract] OR "Neoplasm, Malignant"[Title/Abstract] OR "Neoplasms, Malignant"[Title/Abstract])) |
| BVS / BIREME | (adulto OR adult OR adulto OR "Pessoa de Meia-Idade" OR "Middle Aged" OR "Persona de Mediana Edad" OR idoso OR aged OR anciano OR "Idoso de 80 Anos ou mais" OR "Aged, 80 and over" OR "Anciano de 80 o más Años") AND (farmacêuticos OR pharmacists OR farmacéuticos OR "Assistência Farmacêutica" OR "Pharmaceutical Services" OR "Servicios Farmacéuticos") AND ("Cuidados Paliativos" OR "Palliative Care" OR "Cuidados Paliativos") AND (neoplasias OR neoplasms OR neoplasias) |
| EMBASE | ('adult'/exp OR adult OR 'adults'/exp OR adults OR 'middle aged'/exp OR 'middle aged' OR 'middle age'/exp OR 'middle age' OR 'aged'/exp OR aged OR 'elderly'/exp OR elderly OR 'aged, 80 and over'/exp OR 'aged, 80 and over' OR 'oldest old' OR 'nonagenarians'/exp OR nonagenarians OR 'nonagenarian'/exp OR nonagenarian OR 'octogenarians'/exp OR octogenarians OR 'octogenarian'/exp OR octogenarian OR 'centenarians'/exp OR centenarians OR 'centenarian'/exp OR centenarian) AND ('palliative therapy'/exp OR 'palliative therapy'/syn) AND ('neoplasm'/exp OR 'neoplasm'/syn) AND ('pharmacist'/exp OR 'pharmacist'/syn OR 'pharmacy (shop)'/exp) |
| SCOPUS | ( ALL ( adult OR adults ) OR ALL ( "Middle Aged" OR "Middle Age" ) OR ALL ( aged OR elderly ) OR ALL ( "Aged, 80 and over" OR "Oldest Old" OR nonagenarians OR nonagenarian OR octogenarians OR octogenarian OR centenarians OR centenarian ) ) AND ( TITLE-ABS-KEY ( pharmacists OR pharmacist OR "Clinical Pharmacists" OR "Clinical Pharmacist" OR "Pharmacist, Clinical" OR "Pharmacists, Clinical" OR "Community Pharmacists" OR "Community Pharmacist" OR "Pharmacist, Community" OR "Pharmacists, Community" OR "Retail Pharmacists" OR "Pharmacist, Retail" OR "Pharmacists, Retail" OR "Retail Pharmacist" ) OR TITLE-ABS-KEY ( "Pharmaceutical Services" OR "Services, Pharmaceutic" OR "Services, Pharmacy" OR "Pharmaceutic Services" OR "Pharmaceutic Service" OR "Service, Pharmaceutic" OR "Services, Pharmaceutical" OR "Pharmaceutical Service" OR "Service, Pharmaceutical" OR "Pharmacy Services" OR "Pharmacy Service" OR "Service, Pharmacy" OR "Pharmaceutical Care" OR "Care, Pharmaceutical" ) ) AND ( TITLE-ABS-KEY ( "Palliative Care" OR "Care, Palliative" OR "Palliative Treatment" OR "Palliative Treatments" OR "Treatment, Palliative" OR "Treatments, Palliative" OR "Therapy, Palliative" OR "Palliative Therapy" OR "Palliative Supportive Care" OR "Supportive Care, Palliative" OR "Palliative Surgery" OR "Surgery, Palliative" ) ) AND ( TITLE-ABS-KEY ( neoplasms OR neoplasia OR neoplasias OR neoplasm OR tumors OR tumor OR cancer OR cancers OR malignancy OR malignancies OR "Malignant Neoplasms" OR "Malignant Neoplasm" OR "Neoplasm, Malignant" OR "Neoplasms, Malignant" ) ) |
| WEB OF SCIENCE | All fields: (Adult OR Adults) OR All fields: ("Middle Aged" OR "Middle Age") OR All fields: (Aged OR Elderly) OR All fields: ("Aged, 80 and over" OR "Oldest Old" OR Nonagenarians OR Nonagenarian OR Octogenarians OR Octogenarian OR Centenarians OR Centenarian) Editions=SCI-EXPANDED, SSCI, A&HCI, CPCI-S, CPCI-SSH, ESCI Year Published=All years AND TOPIC: (Pharmacists OR Pharmacist OR "Clinical Pharmacists" OR "Clinical Pharmacist" OR "Pharmacist, Clinical" OR "Pharmacists, Clinical" OR "Community Pharmacists" OR "Community Pharmacist" OR "Pharmacist, Community" OR "Pharmacists, Community" OR "Retail Pharmacists" OR "Pharmacist, Retail" OR "Pharmacists, Retail" OR "Retail Pharmacist") OR TOPIC: ("Pharmaceutical Services" OR "Services, Pharmaceutic" OR "Services, Pharmacy" OR "Pharmaceutic Services" OR "Pharmaceutic Service" OR "Service, Pharmaceutic" OR "Services, Pharmaceutical" OR "Pharmaceutical Service" OR "Service, Pharmaceutical" OR "Pharmacy Services" OR "Pharmacy Service" OR "Service, Pharmacy" OR "Pharmaceutical Care" OR "Care, Pharmaceutical") Editions=SCI-EXPANDED, SSCI, A&HCI, CPCI-S, CPCI-SSH, ESCI Year Published=All years AND TOPIC: ("Palliative Care" OR "Care, Palliative" OR "Palliative Treatment" OR "Palliative Treatments" OR "Treatment, Palliative" OR "Treatments, Palliative" OR "Therapy, Palliative" OR "Palliative Therapy" OR "Palliative Supportive Care" OR "Supportive Care, Palliative" OR "Palliative Surgery" OR "Surgery, Palliative") Editions=SCI-EXPANDED, SSCI, A&HCI, CPCI-S, CPCI-SSH, ESCI Year Published=All years AND TOPIC: (Neoplasms OR Neoplasia OR Neoplasias OR Neoplasm OR Tumors OR Tumor OR Cancer OR Cancers OR Malignancy OR Malignancies OR "Malignant Neoplasms" OR "Malignant Neoplasm" OR "Neoplasm, Malignant" OR "Neoplasms, Malignant") Editions=SCI-EXPANDED, SSCI, A&HCI, CPCI-S, CPCI-SSH, ESCI Year Published=All years |
| GOOGLE SCHOLAR | ("Pharmacy" OR "Pharmaceutical Services" OR "Pharmaceutical Care" OR “Pharmacist) AND ("Palliative Care" OR "Palliative Treatment") AND (Cancer OR Neoplasia OR Oncology) |
